# Supplementary material
Source: publisher site journal article supplement (https://www.dovepress.com/article/300447)
Supplement: Supplementary file 1 [file get_supplementary_file.php]

**Appendix**

*note, survey questions sent to MS1-MS2 were slightly different than MS3-MS4 because we asked MS3-MS4 to reflect on their preclinical (MS1-MS2) years.

**Preclinical curriculum survey instrument (MS1-MS2)**

1. How many total hours per week does medical school consume? (includes lecture, independent studying, small groups, etc.)

- < 30
- 30-40
- 40-50
- 50-60
- 60-70
- 70-80
- 80-90
- > 90

1. How many total hours per week do you spend studying or exploring the social determinants of health (SDH)?

- < 1
- 1-2
- 2-3
- 3-5
- 5-10
- 10-20
- 20-30
- > 30

1. In your current medical school curriculum, do you feel that the level of focus on social determinants of health (SDH) is not enough, appropriate, or too much?

- Not enough focus on SDH
- Appropriate amount of focus on SDH
- Too much focus on SDH

1. Relative to your peers, where would you place your own understanding of social determinants of health?

- Less than my peers
- About average
- More than my peers

1. Where did you complete your preclinical curriculum?

- Twin Cities
- Duluth

1. How old are you?

- [write in]

1. How far are you in medical school?

- MS1
- MS2

1. Racial identity

- Black or African American
- Asian
- American Indian/Alaska Native
- Hispanic/Latino/Spanish Origin
- Prefer not to answer
- Other [write in]

1. Gender identity

- Woman
- Man
- Trans Woman
- Trans Man
- Non-binary or non-conforming
- Prefer not to answer
- Other [write in]

**Preclinical curriculum survey instrument (MS3-MS4)**

1. During your preclinical years (MS1-MS2), how many total hours per week did medical school consume? (includes lecture, independent studying, small groups, etc.)

- < 30
- 30-40
- 40-50
- 50-60
- 60-70
- 70-80
- 80-90
- > 90

1. During your preclinical years (MS1-MS2), how many total hours per week did you spend studying or exploring the social determinants of health (SDH)?

- < 1
- 1-2
- 2-3
- 3-5
- 5-10
- 10-20
- 20-30
- > 30

1. During your preclinical years (MS1-MS2), did you feel that the level of focus on social determinants of health (SDH) was not enough, appropriate, or too much?

- Not enough focus on SDH
- Appropriate amount of focus on SDH
- Too much focus on SDH

1. Relative to your peers, where would you place your own understanding of social determinants of health (SDH)?

- Less than my peers
- About average
- More than my peers

1. Where did you complete your preclinical curriculum?

- Twin Cities
- Duluth

1. How old are you?

- [write in]

1. How far are you in medical school?

- MS3
- MS4

1. Racial identity

- Black or African American
- Asian
- American Indian/Alaska Native
- Hispanic/Latino/Spanish Origin
- Other [write in]
- Prefer not to answer

1. Gender identity

- Woman
- Man
- Trans Woman
- Trans Man
- Non-binary or non-conforming
- Other [write in]
- Prefer not to answer
